# Supplementary material for: Impact of time-dependent data assimilation on ice flow model initialization: A case study of Kjer Glacier, Greenland
Source: Copernicus journal article supplement (doi:10.5194/tc-2023-64), 2023-05-11
Supplement: Supplementary file [file tc-2023-64-AC1-supplement.pdf]

1 Impact of time-dependent data assimilation on ice flow model  
2 initialization: A case study of Kjer Glacier, Greenland  
3 – Authors’ response (RC1) –

4 Youngmin CHOI et al.

5 August 10, 2023

6 *This paper presents results from a transient inversion scheme which utilises automatic differen-*  
7 *tiation to initialise an ice flow model using multiple years of observed velocity data. Analysis is*  
8 *carried out to determine the effects of different lengths of observed data records, and whether the*  
9 *control variables are constant or varying in time. Comparisons are made with the more commonly*  
10 *used “snapshot” inversion, using only a single observational year. The conclusion is that the*  
11 *transient inversion method produces better results for capturing current trends and simulating the*  
12 *evolution of future ice flow, even with a fairly short observational record.*

13 *The manuscript is well written, and the premise of this study is very interesting. There are some*  
14 *nice results presented comparing the different approaches to transient inversion, and figures which*  
15 *display the information clearly. The subject matter is an important topic, and certainly within the*  
16 *scope of The Cryosphere.*

17 We thank the reviewers for reviewing this manuscript and their constructive comments.

18 *However, there is one major issue which I feel must be addressed. A notable difference between*  
19 *the snapshot and transient inversions in this study is that the snapshot inversion only inverts for C,*  
20 *keeping the value of B acquired from an estimate based on temperature. Meanwhile, the transient*  
21 *inversions invert for both B and C. I did not find any justification for this choice, which I imagine*  
22 *could be quite important. Without comparing a snapshot inversion which also inverts for both B*  
23 *and C, it appears to me that the comparison of methods is not like-for-like. Some proportion of the*  
24 *difference could (and I would have thought must) be due to the different treatment of B. It is noted*  
25 *by the authors in their discussion that some parts of the shear margins have a 45% reduction in*  
26 *the value of B after the transient inversions, which use the temperature-based estimate as an initial*  
27 *value. Unless I’ve missed something, from the information given in the current version of the paper,*

28 *there is no reason to think that a similar difference wouldn't occur when using a snapshot inversion*  
29 *if the value of B was also inverted for in that case.*

30 *For me to find the results to convincingly support the conclusion in regard to snapshot vs. transient*  
31 *inversion I would like to see the snapshot inversion performed inverting for both B and C, and then*  
32 *one of the following as appropriate:*

33 *1. Results from the new snapshot inversion compared with the existing one to demonstrate that*  
34 *inverting for B causes negligible difference.*

35 *2. The result from the new snapshot used in the comparisons against the transient inversion*  
36 *results.*

37 *That being said, I do not contest that the transient inversion method does a good job, or that it*  
38 *will likely still do better than a snapshot also inverting for B. I like the overall presentation of this*  
39 *study, and believe other conclusions regarding the different approaches to transient inversion are*  
40 *well supported. I was interested to see an inversion approach to calving parameters also, which is*  
41 *an interesting addition to the study. I find very few issues with the rest of the manuscript and would*  
42 *like to see it published, but have to recommend revision first to address my major issue above.*

43 We agree with the reviewer. We will run the new snapshot experiment that includes an inversion  
44 for both *B* and *C*, and add new results for that.

45 *Specific comments*

46 *Line 55 – “ice sheet models”*

47 We will change this in the revised text, as suggested.

48 *Figure 1 – It would be helpful to include the white line (2007 ice front, I assume, though this*  
49 *should be clarified in the caption) underneath the coloured ice fronts in panel (b) for easy reference*  
50 *between the two panels.*

51 We will add this to the revised text, as suggested.

52 *Line 92 – BedMachine citation appears to be in the wrong format.*

53 We will fix this in the revised text.

54 *Line 153 – Could the equation or chosen value for R be shown?*

55 We will add the equation for R, as suggested.

56 *Line 154 – For completeness, it would be good to show the L-curves and chosen values of  $\gamma$  in an*  
57 *appendix/supplement.*

58 We will add the L-curves to the revised text, as also suggested by the reviewer 2.

59 *Line 179/Table 1 – Why is B not a control variable for the snapshot inversion? It is included in*  
60 *Eq.5, and inverted for in all other experiments. It's not clear to me why the temperature-based*  
61 *estimate is not used as an initial value as it is for the transient inversions. This relates to my major*  
62 *issue with the manuscript, detailed above.*

63 We will add this to the revised text as suggested.

64 *Figure 3 – While it is well explained in the caption, I wonder if a visual key/explanation could*  
65 *be added in some of the empty space of panel (a) to make it clear at a glance what the colours*  
66 *represent. Same for similar figures later on.*

67 We will add the legend for colors to the panel (a).

68 *Line 210 – “there still remain”*

69 We will fix this in the revised text, as suggested.

70 *Line 274 – I don't think “compared to the northern branch” is needed here, since it is immediately*  
71 *discussed in the next sentence. And comparing it to a low bar could detract from the point that the*  
72 *result for that area is quite good.*

73 We will fix this sentence in the revised text to make it clear.

74 *Figure 11 – Could this be displayed side by side with observed ice fronts for easy comparison? It*  
75 *would avoid having to scroll back up to Fig. 1!*

76 We will add the observed ice front positions next to the modeled ice front positions.

77 *Line 344-6 – The point about softening of the shear margins again draws my attention to the fact*  
78 *that B was not treated in the same way in snapshot and transient inversions. Perhaps the shear*  
79 *margins would have been softened to some extent in a snapshot inversion for B?*

80 We will explain this along with the revisions for new comparison between snapshot and transient  
81 inversions above.
