# Supplementary material for: Impact of time-dependent data assimilation on ice flow model initialization: A case study of Kjer Glacier, Greenland
Source: Copernicus journal article supplement (doi:10.5194/tc-2023-64), 2023-05-11
Supplement: Supplementary file [file tc-2023-64-AC2-supplement.pdf]

1 Impact of time-dependent data assimilation on ice flow model  
2 initialization: A case study of Kjer Glacier, Greenland  
3 – Authors’ response (RC2) –

4 Youngmin CHOI et al.

5 August 10, 2023

6 *In this study, authors make use of the vast amount of spatial and temporal coverage of satellite ice*  
7 *velocity observations and ice front positions of the Kjer Glacier (West Greenland). With the goal*  
8 *of improving the glacier’s initial state and projections using transient inversions of the control*  
9 *parameters (the ice viscosity parameter  $B$  and the friction parameter  $C$ ) in the model. The authors*  
10 *show that their methods can be applicable to two glaciers in the region. They also explore the*  
11 *possibility of including the stress threshold ( $\sigma_{max}$ ) of the calving law as an additional control*  
12 *parameter while using the static friction coefficient ( $C$ ) and viscosity parameter ( $B$ ) obtained from*  
13 *the transient inversions (T1 in Table 1). Finally, the authors explore the possibility of inverting for*  
14 *all control parameters at once ( $C$ ,  $B$ , and  $\sigma_{max}$ ).*

15 *They conclude that transient inversions (on  $B$  and  $C$ ) are able to capture the current trend of*  
16 *changes in glacier velocity better than snapshot inversions, and that those transient inversions*  
17 *improve the models ability to predict near-future changes. Even if a short period of observations is*  
18 *used for the calibration.*

19 *An additional experiment on the calving control parameter ( $\sigma_{max}$ ) shows that it is possible to invert*  
20 *for this poorly constrained parameter via data assimilation techniques and reproduce to a certain*  
21 *extent the retreat of the Kjer glacier.*

22 *They also imply in their conclusion (this is not clearly stated) that the calibrated parameters depend*  
23 *strongly on the strength of the regularisation imposed (choice of weights) for each misfit term in*  
24 *the Cost functions, which leads to several solutions for control parameters and to an overfitting, if*  
25 *L-curve analysis is used to estimate the strength of the regularisation.*

26 *Overall, I find the manuscript well written, with a clear narrative and description of the methods*  
27 *and experiments. I also find the whole manuscript very interesting to read. I learned a lot!*

28 *I will definitely recommend the publication of the manuscript after the authors clarify some of my*  
29 *questions below and make some minor changes.*

30 We thank the reviewers for reviewing this manuscript and thier constructive comments.

31 *Main comment:*

32 *The authors do not describe how the L-curve criteria has been applied in their study. I think this*  
33 *should be explained in Section 2.4 (L151-162). There is no information on the values of the ( $\gamma$ ) and*  
34 *no L-curves are shown. There should be some information on how these parameters are chosen.*  
35 *In other words, how the authors choose the strength of their regularisation in each Cost function?*  
36 *Maybe some explanation similar to previous studies that use L-curve analysis (Gillet-Chaulet et al.*  
37 *2012; Seddik et al. 2017; Barnes et al. 2021).*

38 *Probably authors could also add a table in the annex with the  $\gamma$  parameter values and the L-curves*  
39 *(or L-surface if that is the case) and describe what criteria they used for choosing  $\gamma$  values and*  
40 *if they keep the same values for all the experiments. They mention some overfitting and that more*  
41 *investigation is needed in this area, I think this is an important point and should be highlighted.*

42 We agree with the reviewer regarding this point. This is also suggested by the other reviewer. We  
43 will add the L-curve plot figure and explain how  $\gamma$  was chosen. We kept the same values for this  
44 study and we will add that to the revised text as well.

45 *Is also not clear to me why in the SI experiment, the authors do not invert for the ice viscosity*  
46 *parameter ( $B$ ) and estimate  $B$  from modelled ice temperature instead (and only in that experiment).*  
47 *This will just add extra uncertainties to the inverted field (i.e. errors in the ice temperature model*  
48 *will be propagated to the results). This error could be difficult to account for and might influence*  
49 *the results shown in Figure 3 for the SI inversion. Clarifying that will strengthen the results of the*  
50 *manuscript.*

51 We agree with the reviewer. We will run the new snapshot simulation that includes the inversion  
52 for the ice viscosity parameter ( $B$ ), and add those results.

53 *Title suggestion: maybe this should be initialization and projections (or forecast).*

54 We will change the current title to “Impact of time-dependent data assimilation on ice flow model  
55 initialization and projections: A case study of Kjer Glacier, Greenland”, as suggested.

56 *L17: “accurate mass balance” – > “accurate ice sheet mass loss”*

57 We will change this in the revised text, as suggested.

58 *L30: “but often fail at accurately capturing their present-day configuration”, add citation.*

59 We will add it to the revised text.

60 *L45-L60: literature review, probably I missed this but it could be nice if the authors relate those*  
61 *studies to transient inversions (what studies use that type of calibration technique, additionally to*  
62 *the use of AD and data assimilation).*

63 We will clarify this in the revised text.

64 *L130: Remind the reader what parameters you are inverting for? It will be good to mention this*  
65 *also in the Introduction.*

66 We will add it to the revised text.

67 *L144-146: “This approach allows to better understand the physical process involved in reproduc-*  
68 *ing the ice stream. . . ” Point to evidence of this in the results section.*

69 We will add it to the revised text, as suggested.

70 *L190: “limit uncertainties from calving parametrisations”, I will add (this is optional): that it*  
71 *also avoids having to reconcile the SMB (estimated by RACMO) with the mass loss estimated by*  
72 *the calving law.*

73 We will add it to the revised text, as suggested.

74 *L283-284: “which improves the model’s ability” – > “which improves confidence in the model’s*  
75 *ability to provide realistic near-future projections”. Maybe mention that calibration error and its*  
76 *influence on the model projections still needs to be quantified.*

77 We will change this in the revised text, as suggested. We will also mention the calibration error  
78 and its influence.

79 *L289: “. . . 2007 to 2018 is overestimated” indicate the colour of the line in the figure.*

80 We will add this to the revised text.

81 *L299-L301: “These results demonstrate that the simulations based on the transient inversion can*  
82 *enhance our confidence in near-future projections, even with a limited period of observations and*  
83 *when these observations include limited variability to properly calibrate the model”.*

84 *What happens if the observations used for the transient inversions have a lot of variability in ice*  
85 *velocity? For example if you were to use 2010-2013 (where there is more variability than the*  
86 *periods used for Fig 5) would the model be able to predict changes in the following years?*

87 We expect the model is able to predict changes after the inversion period. To show this, we will  
88 run additional experiments and add those results.

89 *L306: It will be nice to add a comment (though this is optional as it is not the goal of the study)*  
90 *regarding the quantification of calibration uncertainty in transient inversions and the propagation*  
91 *of this type of error to projections. The error in the inverted parameters for this type of calibration*  
92 *will be very expensive to quantify via state-of-the-art Markov chain Monte Carlo (MCMC) methods*  
93 *(Tierney, 1994. Petra et al. 2014) and/or Hessian-based Bayesian approaches (Isaac et al., 2015,*  
94 *Koziol et al., 2021), as they will require multiple evaluations of the forward model to sample all*  
95 *the variability in the parameter space. For snapshot inversions the forward model is just a single*  
96 *velocity solved and for transient inversions this forward model is a sequence of time steps. Thus*  
97 *very expensive for error quantification in large-scale inverse problems ( $\approx 100,000$  mesh elements).*  
98 *Probably this is a limitation for large scale ice sheet problems but might be possible for marine-*  
99 *terminating glaciers elsewhere.*

100 This is an interesting point and we will add a comment about uncertainty quantification to the  
101 revised text.

102 *L346: The authors write: “Although large spatial and temporal variability in control parameters*  
103 *could improve the model fit to observations, clear physical justification should be made to avoid*  
104 *overfitting”. “Physical justification” of what? I get a bit lost in this statement.*

105 We meant the “physical justification of changing control parameters every year” as we did in  
106 TR\_CTR experiments. We will clarify this in the revised manuscript.

#### 107 *Figures*

108 *Figure 3, 5, 7, 12 and 13a, will benefit by including in the plots the uncertainty in the ITS\_LIVE*  
109 *dataset (ideally the standard deviation of the data set) this could be added to the plot by either*  
110 *using error bars in a scatter plot or changing the size of the triangles according to the error in the*  
111 *data base? This will help us identify if model results are within the observations uncertainty at a*  
112 *given location (and time).*

113 We will add this to the revised manuscript.

114 *Figure 4, 6 and 8. Add citation to the legend for the observations.*

115 We will add it to the revised manuscript, as suggested.

116 *Figure 10. There is a mistake in the caption for the third column, seems like it has the same*  
117 *as the Second column caption but they are different experiments according to Table 1. Check for*  
118 *inconsistencies with Table 1.*

119 We will fix this in the revised manuscript.
